# Supplementary material for: Gut Bacteria of Rattus rattus (Rat) Produce Broad-Spectrum Antibacterial Lipopeptides
Source: PubMed Central journal article supplement — ACS Omega. 2021 Apr 26;6(18):12261–73. doi: 10.1021/acsomega.1c01137 (PMC8154139; doi:10.1021/acsomega.1c01137), 2021-04-26
Supplement: ao1c01137_si_001.pdf [file ao1c01137_si_001.pdf]

## Supplementary information

### **Gut bacteria of *Rattus rattus* (rat) produce broad-spectrum antibacterial lipopeptides**

Noor Akbar, Ruqaiyyah Siddiqui, Mazhar Iqbal, Kuppusamy Sagathevan, Kwang Sik Kim, Fazal

Habib, Naveed Ahmed Khan\*

Figure S1:

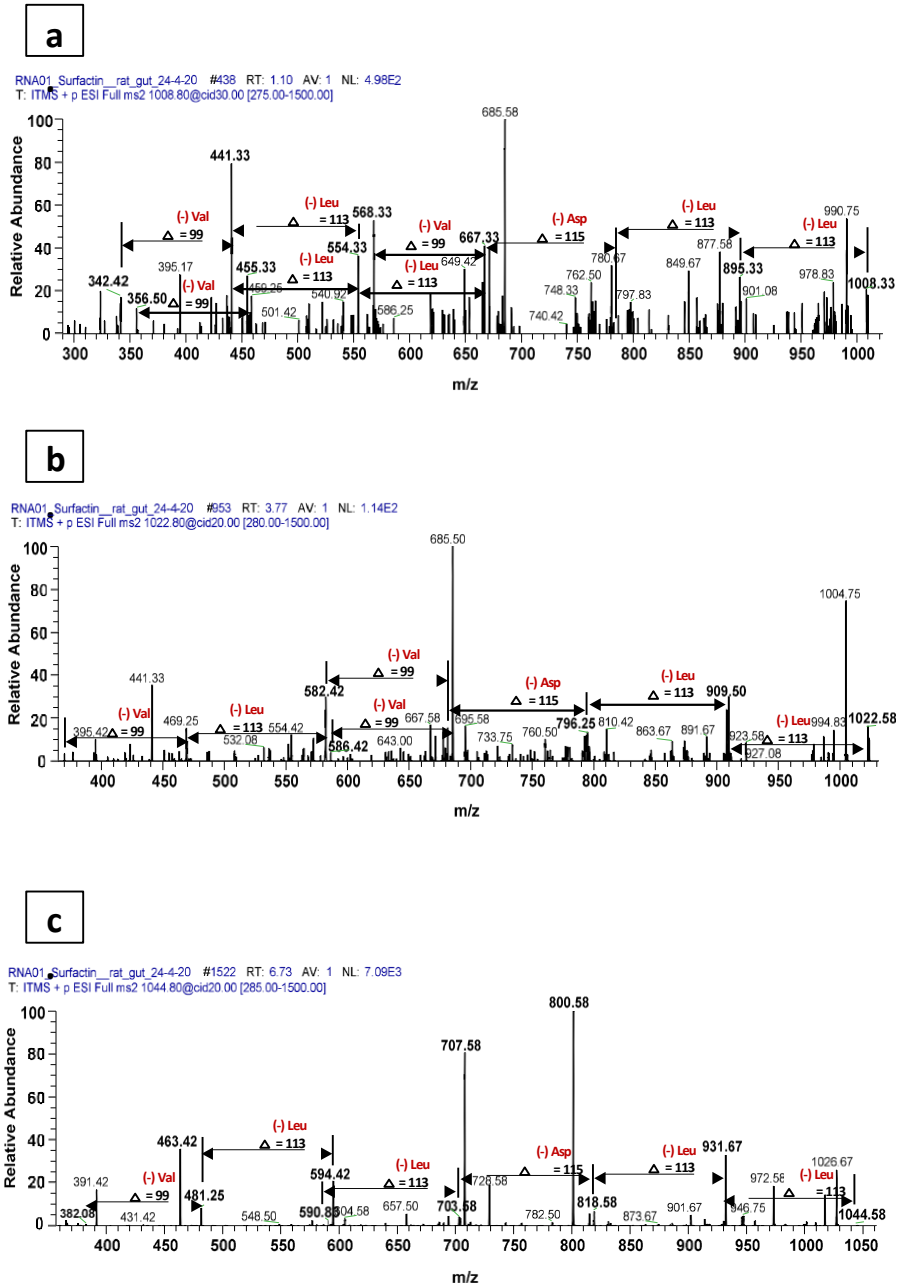

Figure S1:

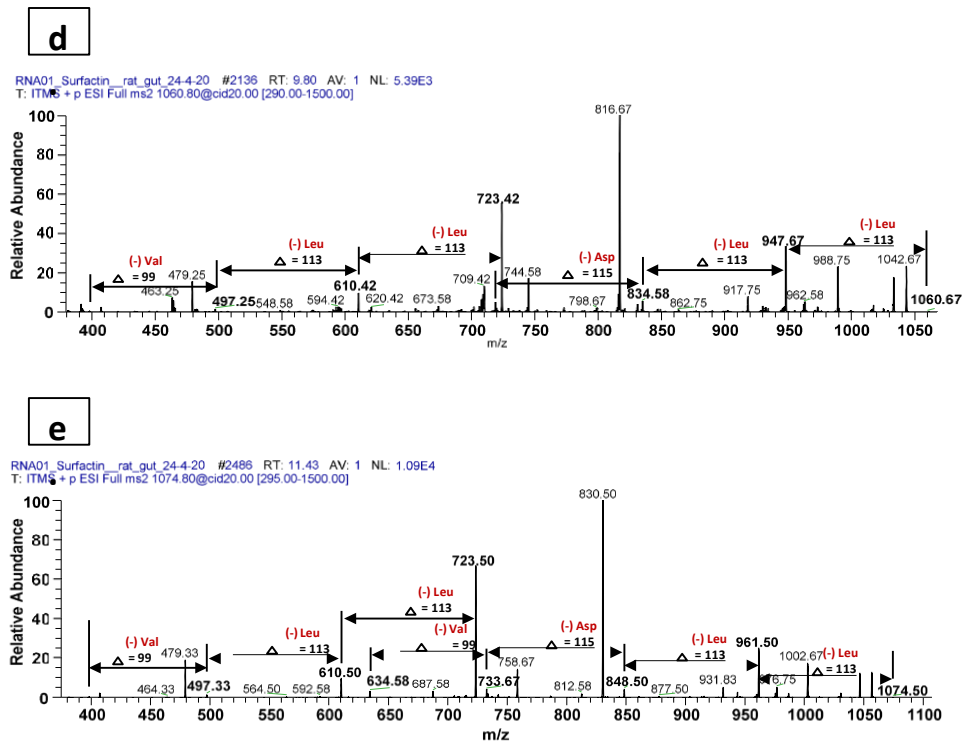

**Figure S1.** ESI/MS spectrum of *B. subtilis* CM2 extract demonstrated the presence of surfactin analogues analyzed at positive ion mode. **a)** Profiling of the fragmentation data generated through the ESI-MS/MS of  $m/z$  1008.33  $[M+H]^+$  by CID (energy 30.0) at positive ion mode. **b)** Presumed structures of the all fragments ion generated through CID of the  $m/z$  1022.58  $[M+H]^+$ . **c)** Putative structures of fragments ions of  $m/z$  1044.58, **d)** Profiling of fragmentation data of 1060.67 and **e)** Profiling of the fragmentation data of 1074.50  $[MMH]^+$ .

Figure S2:

a.

RNA01\_IiturinA\_rat\_gut #454 RT: 2.73 AV: 1 NL: 5.00E2  
T: ITMS + p ESI Full ms2 1057.58@cid10.00 [290.00-1300.00]

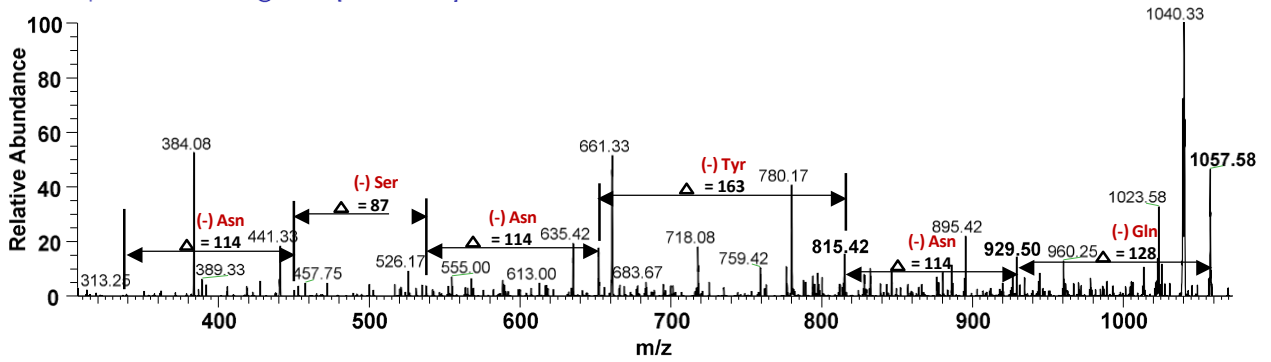

b.

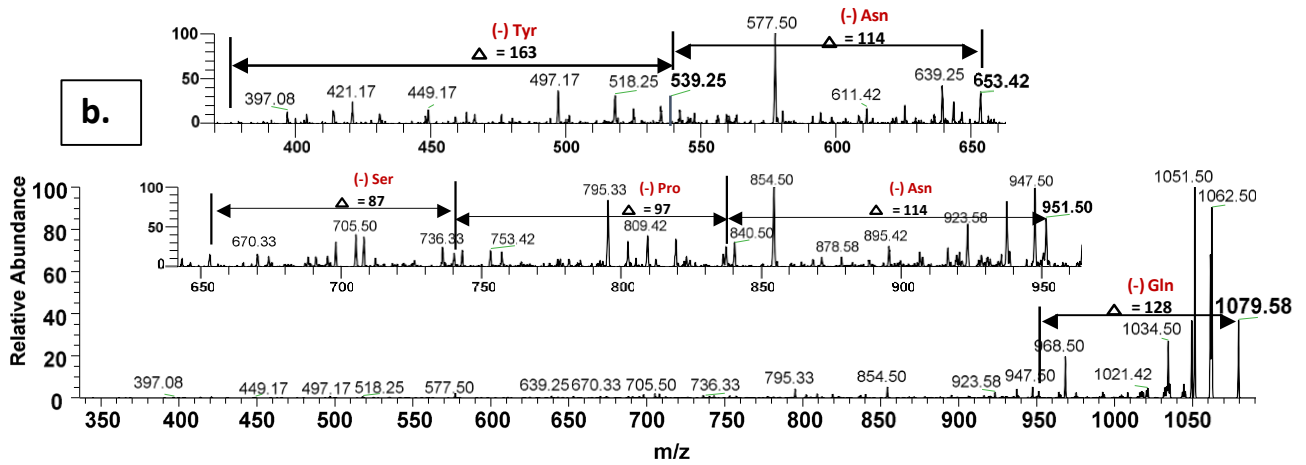

c.

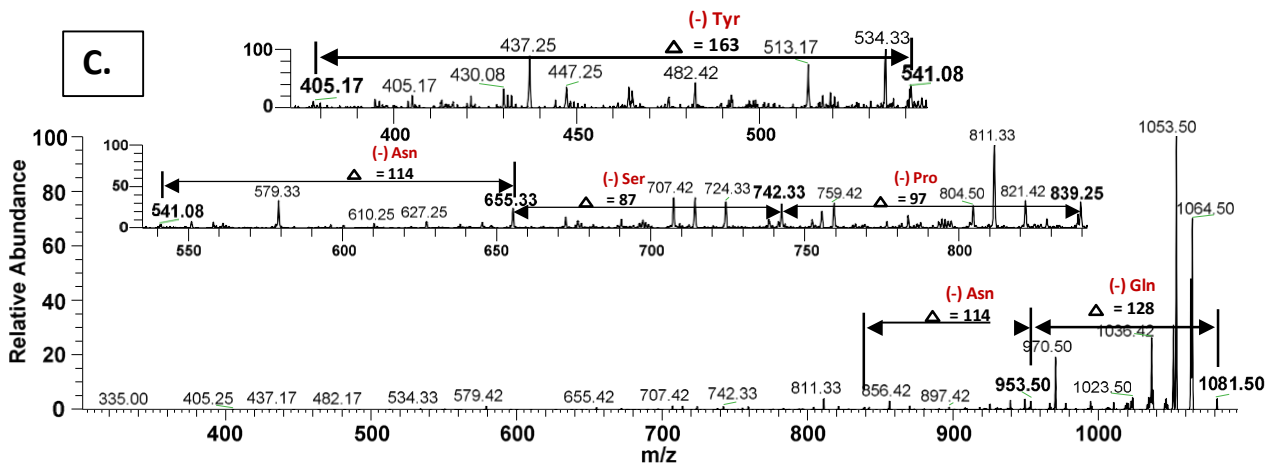

Figure S2. Putative structures of the fragment ion generated through CID of the a)  $m/z$  at 1057.58, b) 1079.58 and c) 1081.50  $[M+H]^+$  respectively.

**Figure S3:**

**a.**

Surfactin\_standard\_20-10-20 #1681 RT: 7.48 AV: 1 NL: 6.16E4  
T: ITMS + p ESI Full ms [285.00-1

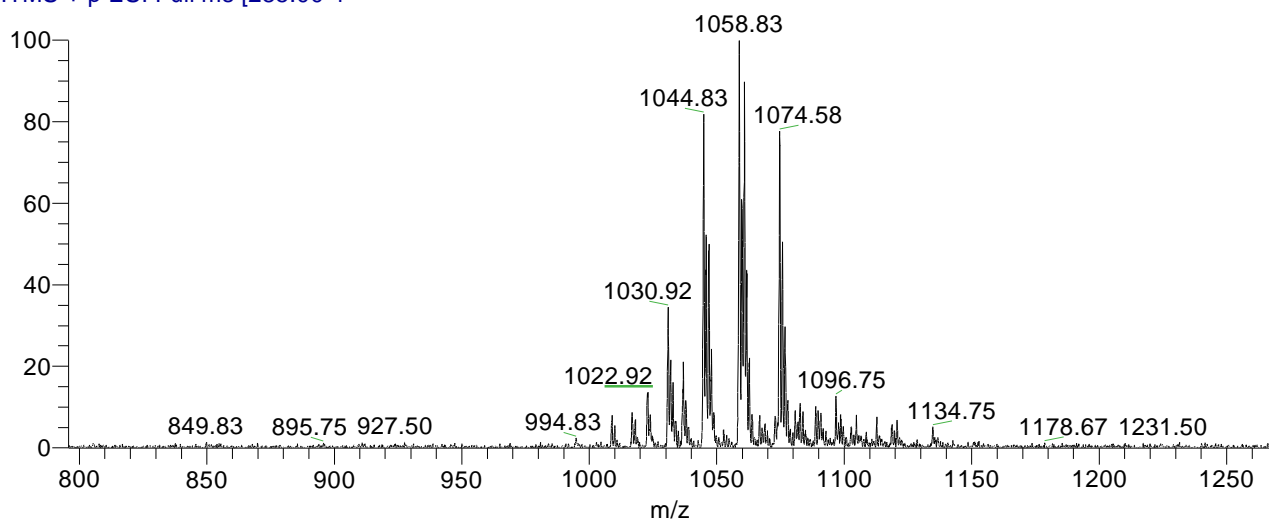

**b.**

Surfactin\_standard\_20-10-20 #1170 RT: 4.76 AV: 1 NL: 1.92E3  
T: ITMS + p ESI Full ms2 1030.80

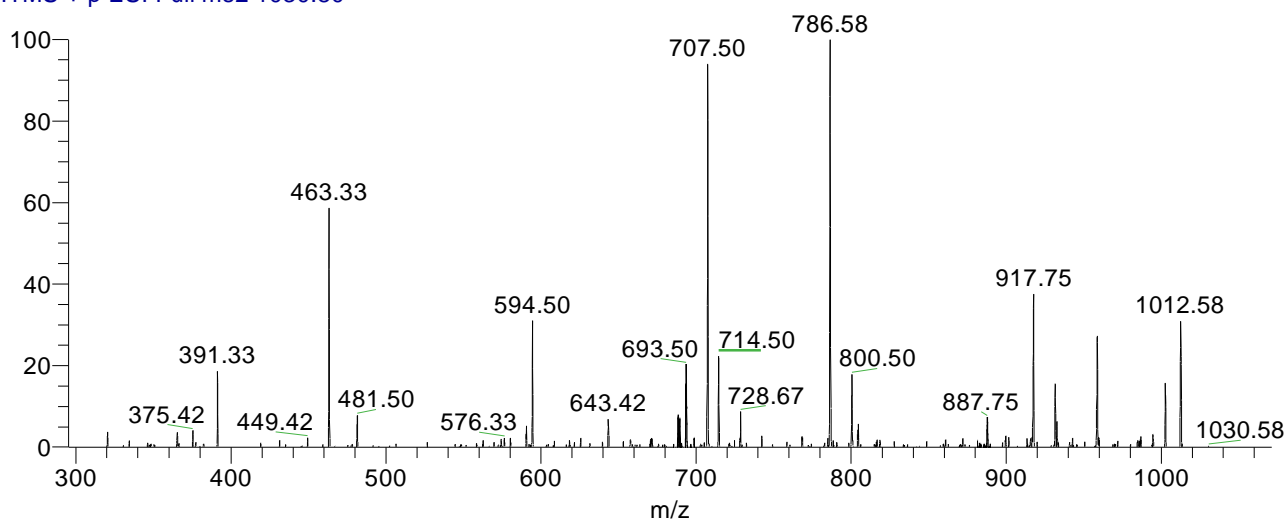

**Figure S3.** ESI-MS spectrum of surfactin standard. **a)** Full scan spectrum of surfactin molecules and **b)** MS/MS of  $m/z$  at 1030.58  $[M+H]^+$ .

**Figure S4:**

**a.**

Standard Iturin A Sigma #323 RT: 2.00 AV: 1 NL: 2.98E3  
T: ITMS + p ESI Full ms [285.00-1

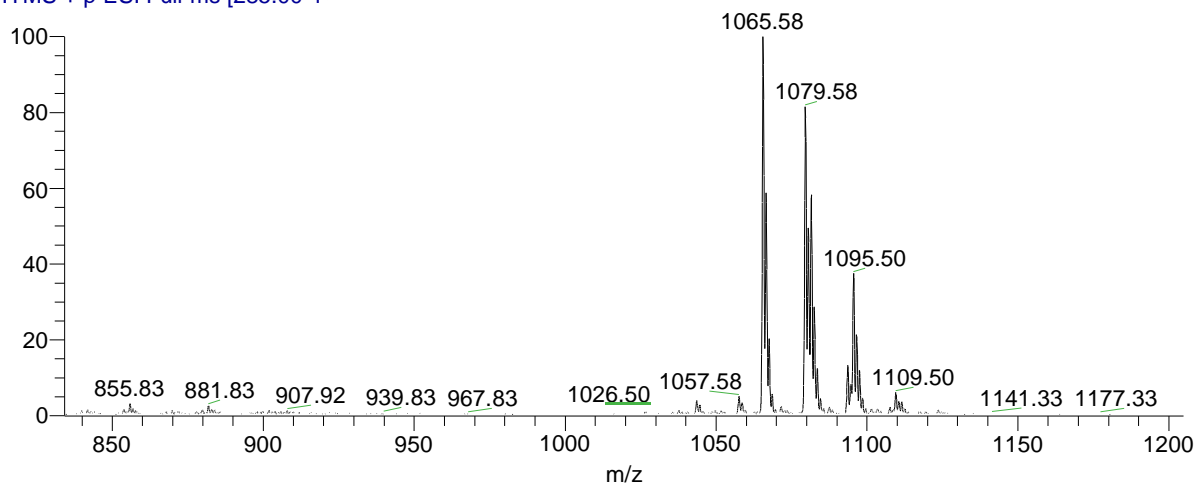

**b.**

Standard Iturin A Sigma #451 RT: 2.72 AV: 1 NL: 4.12  
T: ITMS + p ESI Full ms2 1057.58

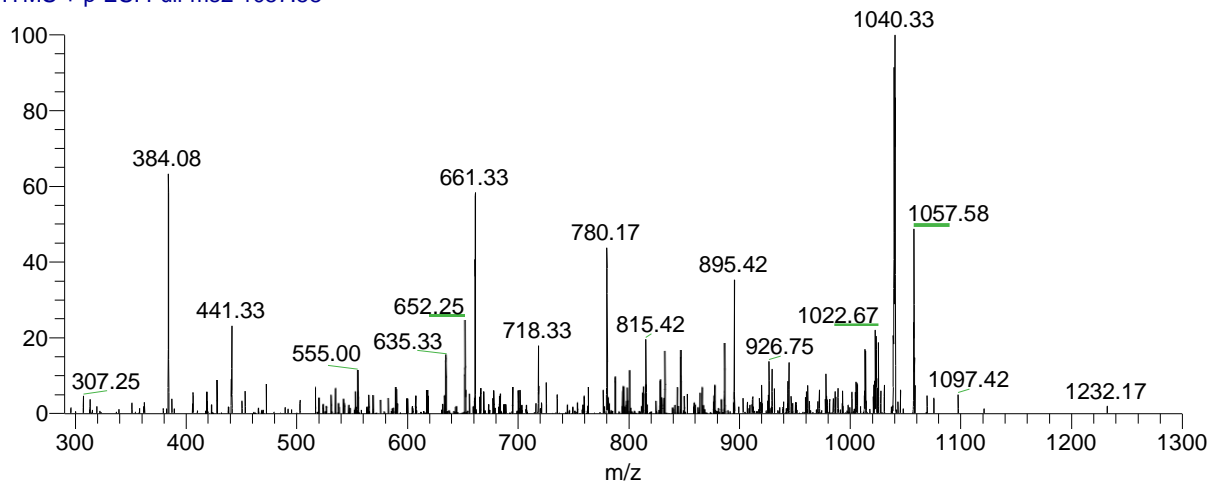

**Figure S4.** ESI-MS spectrum of Iturin A standard. **a)** Represents the full scan spectrum of Iturin A molecules and **b)**  $m/z$  at 1057.58  $[M+H]^+$ .
